# Supplementary material
Source: PubMed Central journal article supplement (PMC5785084)
Supplement: NIHMS934903-supplement-Supplemental_Figures.pdf [file NIHMS934903-supplement-Supplemental_Figures.pdf]

## Supplemental Figures

**Figure S1.** Evaluation of binding capacity of unmodified (A) and C18-supplemented (B) Stage-Tips<sup>TM</sup>.

**Figure S2.** Efficiency and reproducibility of micro-bRPLC fractionation of alpha-crystallin peptides.

**Figure S3.** Increase in numbers of distinct identified peptides (filled bars) and protein spectral counts (open bars) for micro-bRPLC-fractionation combined with LC-MS/MS compared to single-dimension LC-MS/MS analysis of unfractionated of colon tumor peptide mixtures. Values are for 15 representative quantifiable proteins in both analysis platforms.

**Figure S4.** Pairwise scatter plots and Spearman correlation coefficient ( $r$ ) for average spectral counts per protein acquired from analyses of three replicate cultures of 11-18 and 11-18R cells with either 20  $\mu$ g and 5  $\mu$ g inputs.

**Figure S5.** Comparison of the abundance ratio for 16 proteins in 11-18 vs. 11-18R cells from analyses of either 20  $\mu$ g or 5  $\mu$ g cell protein.

**Figure S6.** Reproducibility of 4-plex iTRAQ quantitation for analysis of two replicate cultures of 11-18 and 11-18R cells.

**Figure S7.** Relative iTRAQ reporter ion ratios for representative peptides corresponding to ACTIN (A), which is equally expressed in 11-18 vs 11-18R cells and ALDH3A1 (B), MVP (C) and S100P (D), which are significantly decreased in 11-18R.

**Figure S8.** Efficient and reproducible fractionation of PTK peptides in 20  $\mu$ g 11-18 cell by micro-bRPLC.

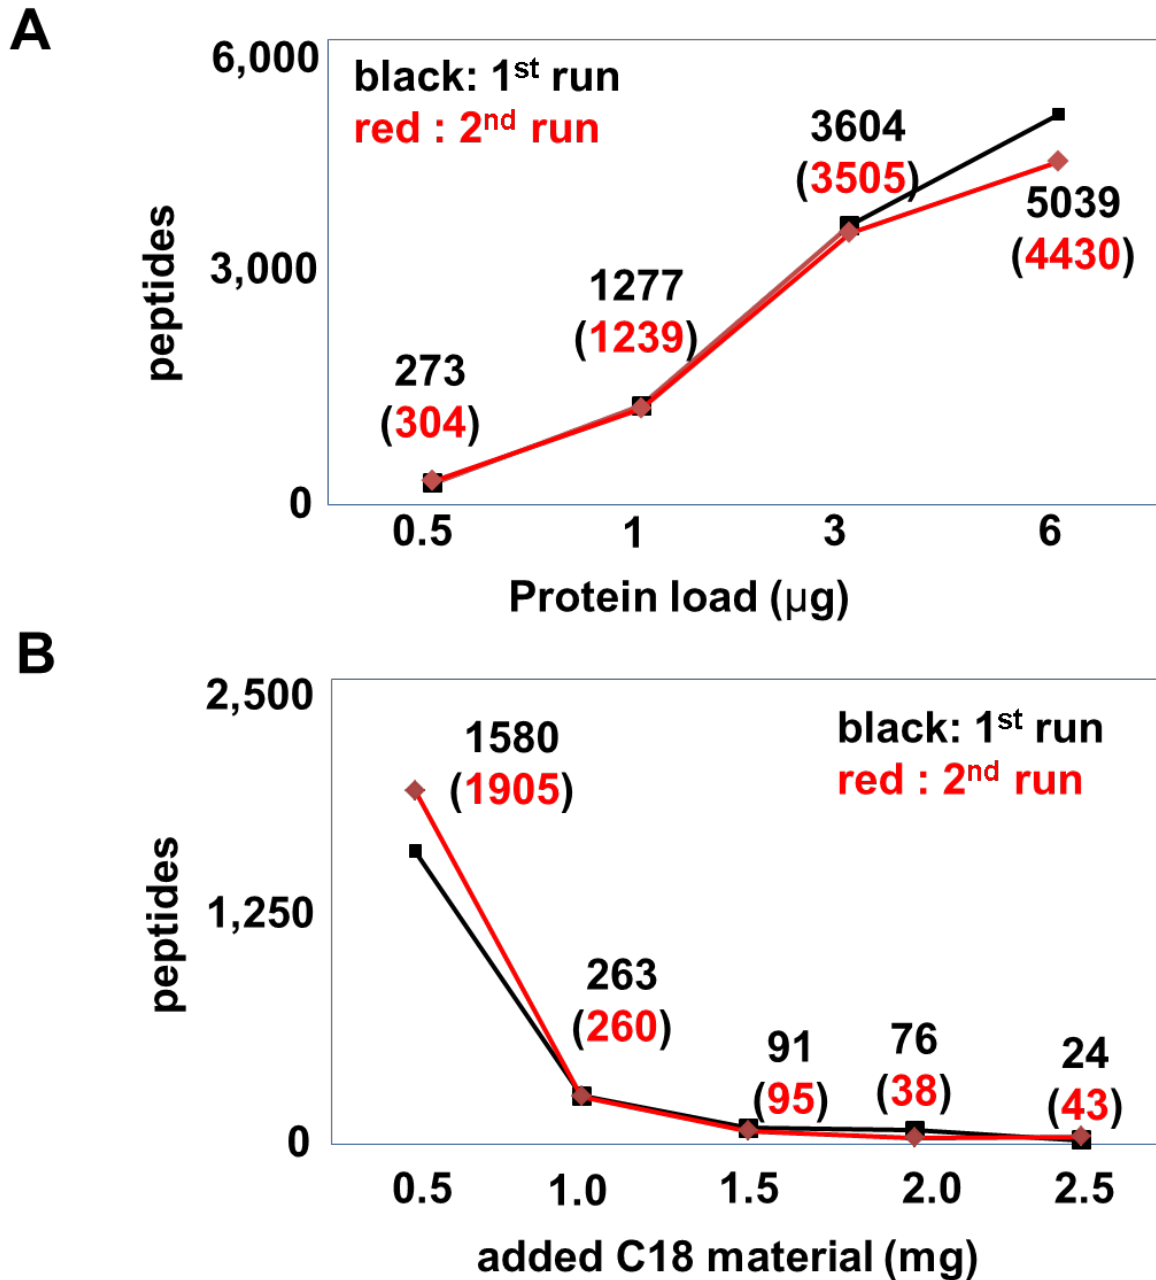

**Figure S1.** Evaluation of binding capacity of unmodified (A) and C18-supplemented (B) Stage-Tips<sup>TM</sup>. (A) Colon tumor protein digests at the indicated amounts were loaded on unmodified Stage Tips and the flow-through fraction was collected and analyzed by data-dependent shotgun LC-MS/MS. Digest loads above 0.5 µg exceeded the column capacity. (B) Increasing amounts of C18 material were added to Stage-Tip<sup>TM</sup> columns and 20 µg colon tumor digest was loaded and the flow through fraction was analyzed by LC-MS/MS. Addition of 1.5 mg C18 was sufficient to reduce flow through peptide elution to background levels.

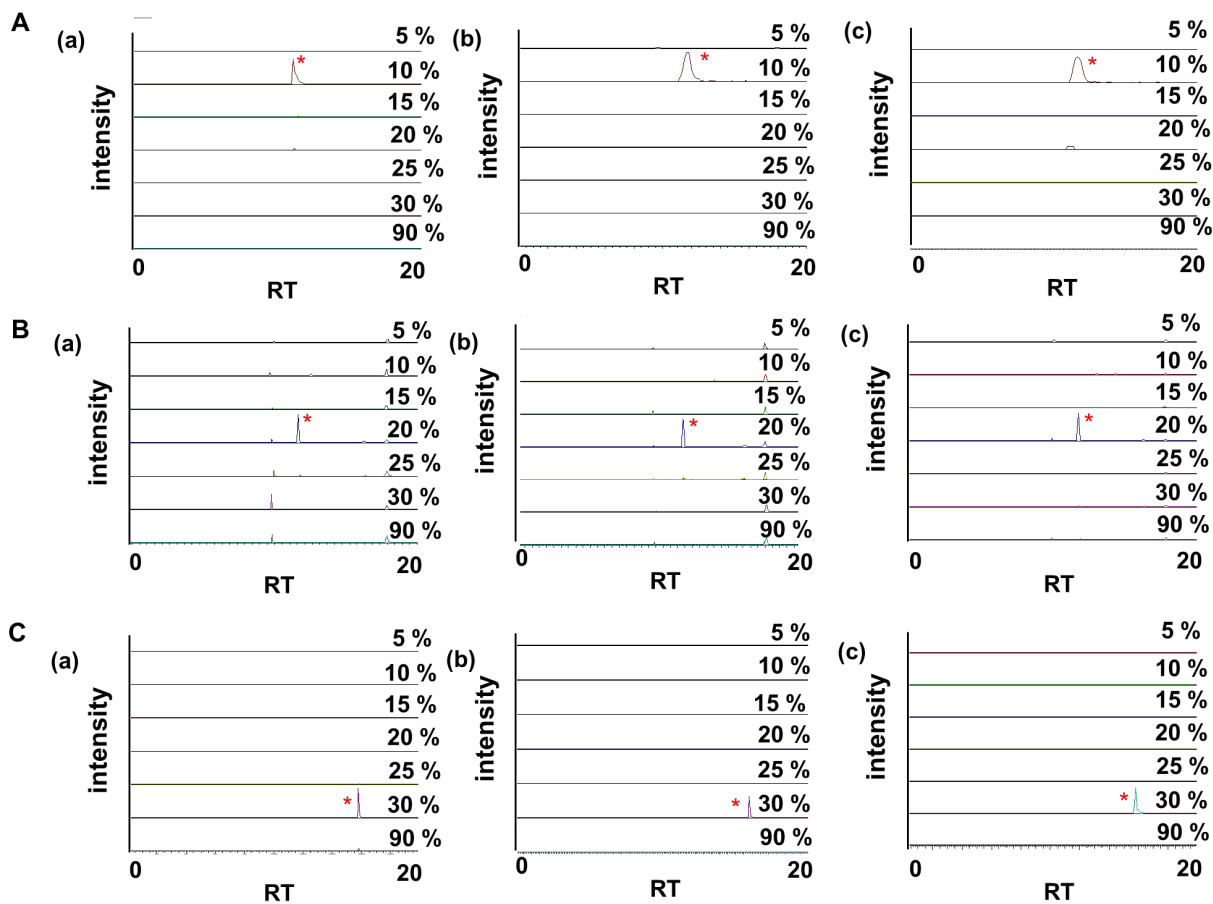

**Figure S2.** Efficiency and reproducibility of micro-brPLC fractionation of alpha-crystallin peptides. Three aliquots (2  $\mu$ g) alpha-crystallin, were digested and fractionated by micro-brPLC (7 fractions) and 10 % of each fraction was analyzed by LC-MS/MS. MS1 data were used to generate extracted ion chromatograms (XIC) for alpha-crystallin peptides HEERQDEHGFISREFHR (m/z 442.6150, 5+) (A), VKVLGDVIEVHGKHEER (m/z 486.7725, 4+) (B), and M(ac)DIAIQHPWFKR (m/z 528.6104, 3+) in three replicate runs (a-c) Asterisks mark the retention of the target peptides.

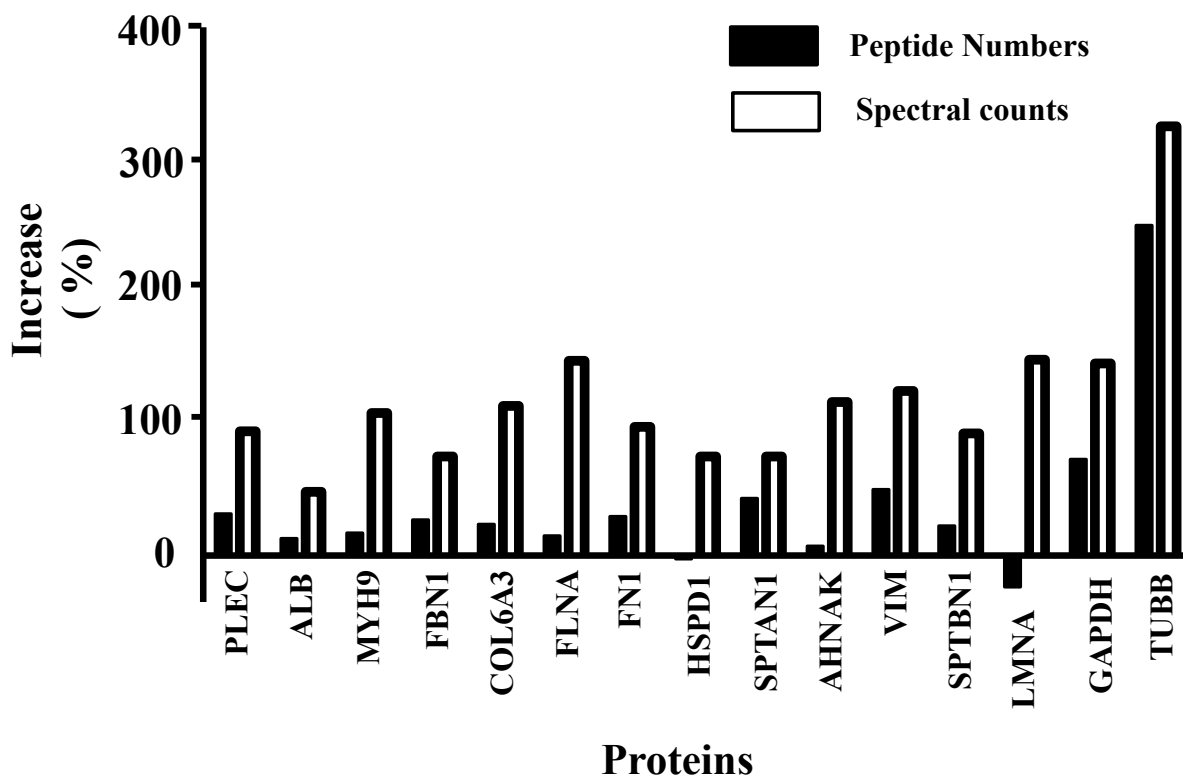

**Figure S3.** Increase in numbers of distinct identified peptides (filled bars) and protein spectral counts (open bars) for micro-bRPLC-fractionation combined with LC-MS/MS compared to single-dimension LC-MS/MS analysis of unfractionated of colon tumor peptide mixtures. Values are for 15 representative quantifiable proteins in both analysis platforms.

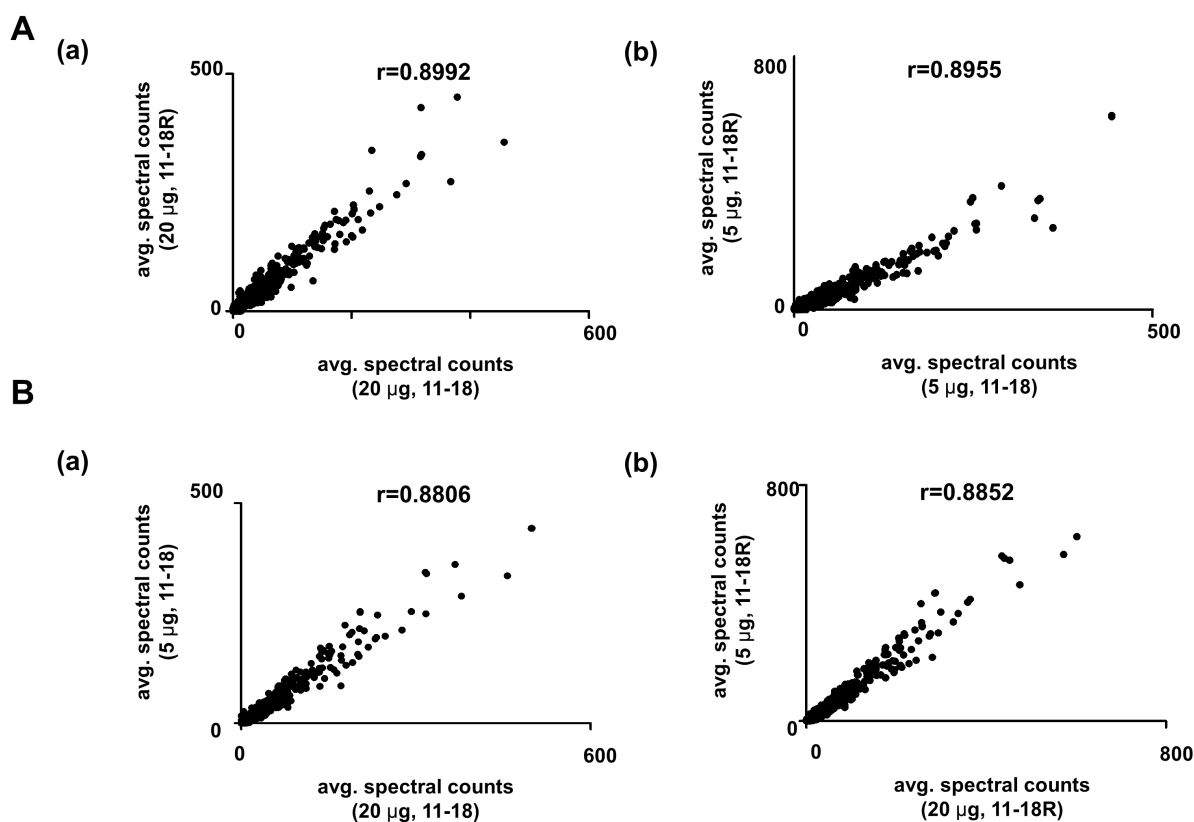

**Figure S4.** Pairwise scatter plots and Spearman correlation coefficient ( $r$ ) for average spectral counts per protein acquired from analyses of three replicate cultures of 11-18 and 11-18R cells with either 20  $\mu\text{g}$  and 5  $\mu\text{g}$  inputs. (A) Spearman correlation for 11-18 versus 11-18R for 20  $\mu\text{g}$  (a) and 5  $\mu\text{g}$  (b) inputs. (B) Spearman correlation for 20  $\mu\text{g}$  versus 5  $\mu\text{g}$  inputs for 11-18 (a) and 11-18R (b). Either 20  $\mu\text{g}$  or 5  $\mu\text{g}$  protein from 11-18 and 11-18R cells were digested and subjected to micro-bRPLC fractionation ( 7 fractions). A total of 5  $\mu\text{g}$  protein digest was loaded on-column for LC-MS/MS (25% of 20  $\mu\text{g}$  samples and 100 % of 5  $\mu\text{g}$  samples).

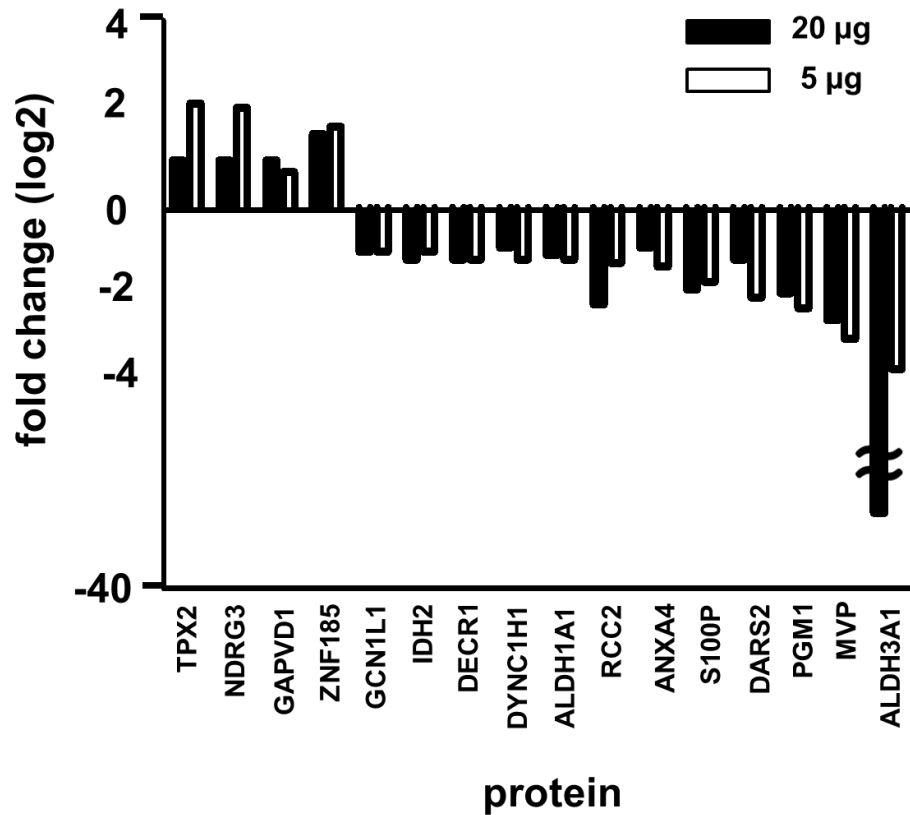

**Figure S5.** Comparison of the abundance ratio for 16 proteins in 11-18 vs. 11-18R cells from analyses of either 20 µg or 5 µg cell protein. Digests were fractionated by micro-bRPLC (7 fractions). A total of 5 µg protein digest was loaded on-column for LC-MS/MS (25% of 20 µg samples and 100 % of 5 µg samples). The abundance ratio for each protein was calculated from the mean spectral counts from data-dependent LC-MS/MS analyses.

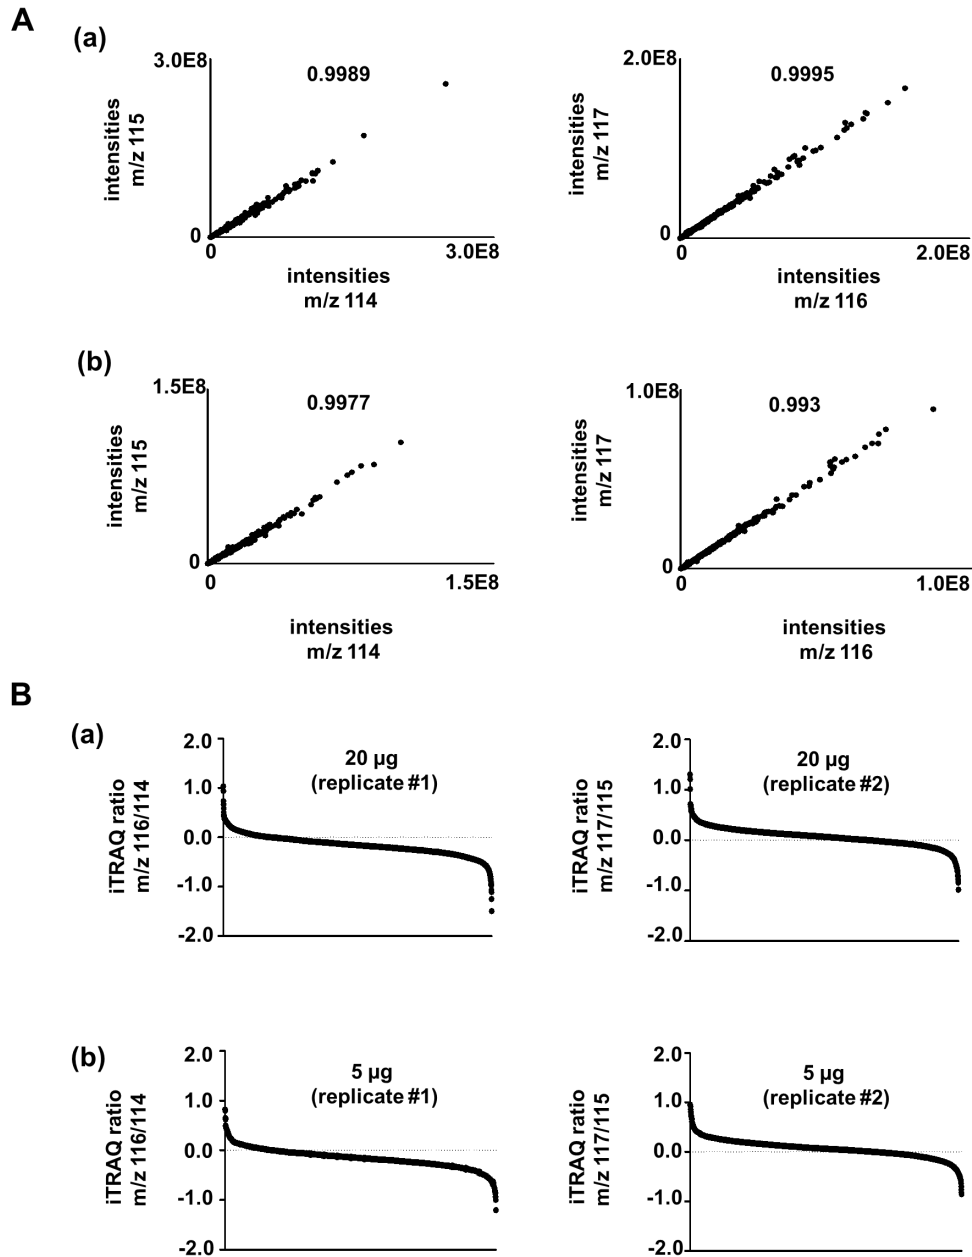

**Figure S6.** Reproducibility of 4-plex iTRAQ quantitation for analysis of two replicate cultures of 11-18 and 11-18R cells. Digests from two replicate cultures of each cell line were labeled with 4-plex iTRAQ (114; 11-18, 115; 11-18', 116; 11-18R, 117; 11-18R') and mixed in equal proportions. Normalized reporter ion intensities were summed for all peptides for each protein detected in both replicates. (A) iTRAQ reporter ion intensities obtained from 2 biological replicates were used for pairwise scatter plot and Spearman correlation. Both 20 µg (a) and 5 µg (b) sample loads were fractionated by micro-bRPLC (7 fractions). (B) Distribution of global iTRAQ ratio between 11-18 and 11-18R quantified with 4-plex iTRAQ for 20 µg (a) and 5 µg

(b).

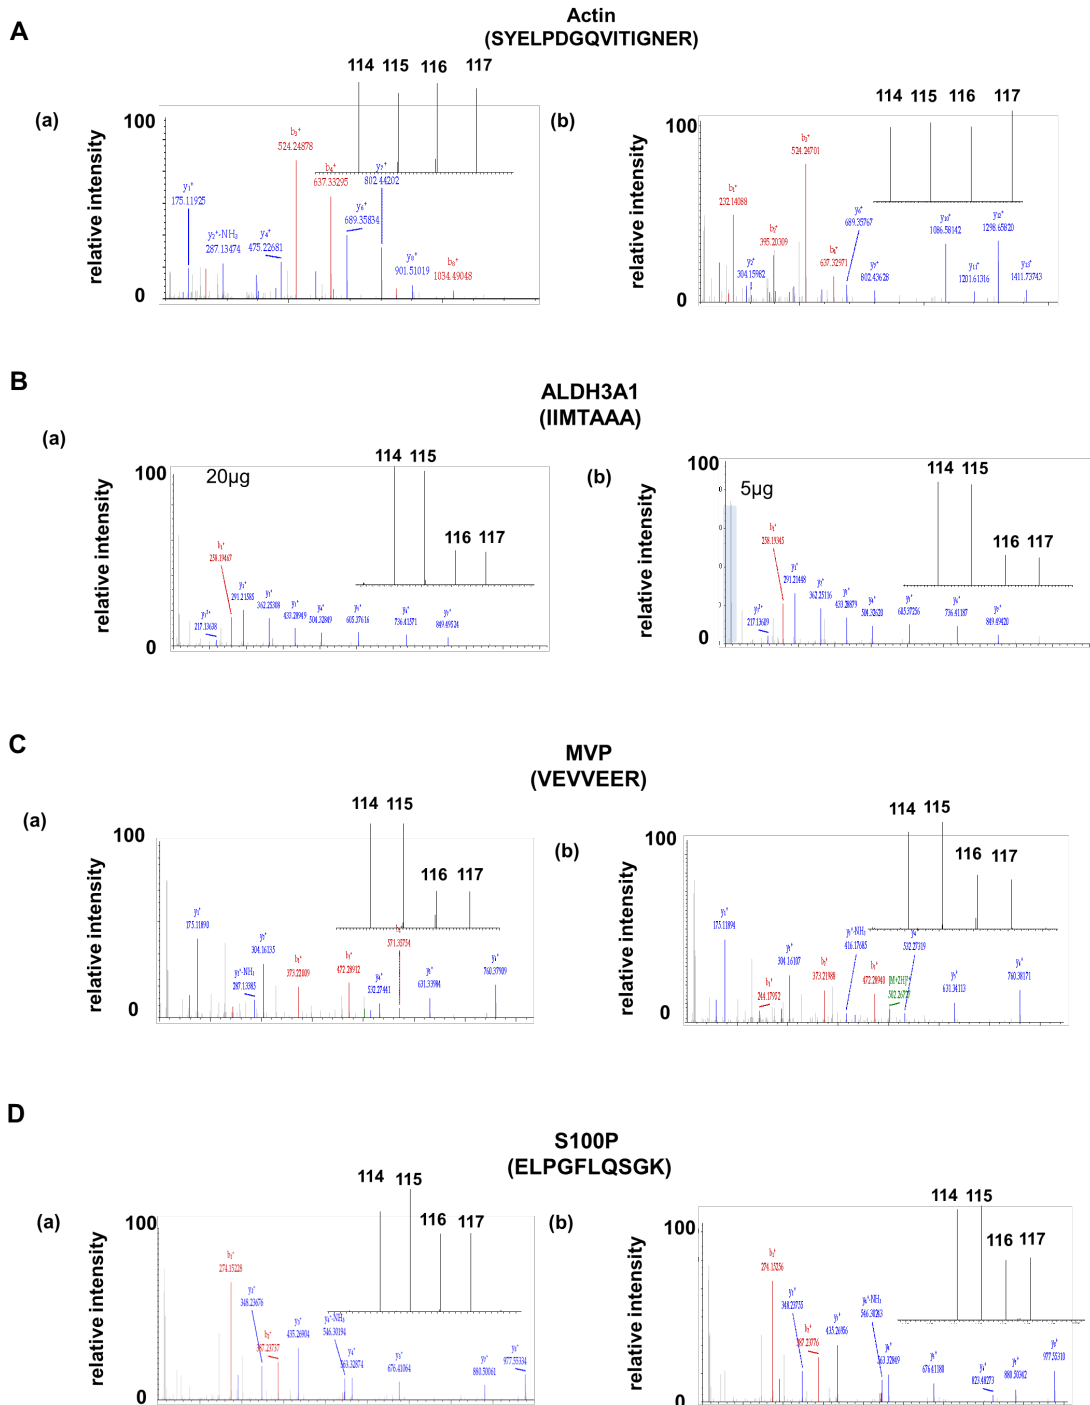

**Figure S7.** Relative iTRAQ reporter ion ratios for representative peptides corresponding to ACTIN (A), which is equally expressed in 11-18 vs 11-18R cells and ALDH3A1 (B), MVP (C) and S100P (D), which are significantly decreased in 11-18R. Analyses were done with micro-bRPLC fractionation of 20 µg (a) and 5 µg (b) digests.



**A**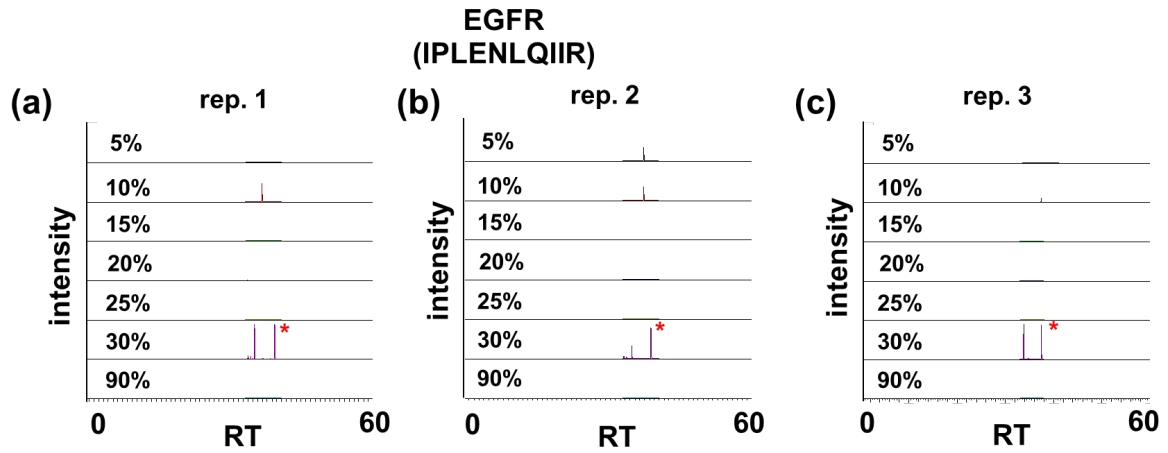**B**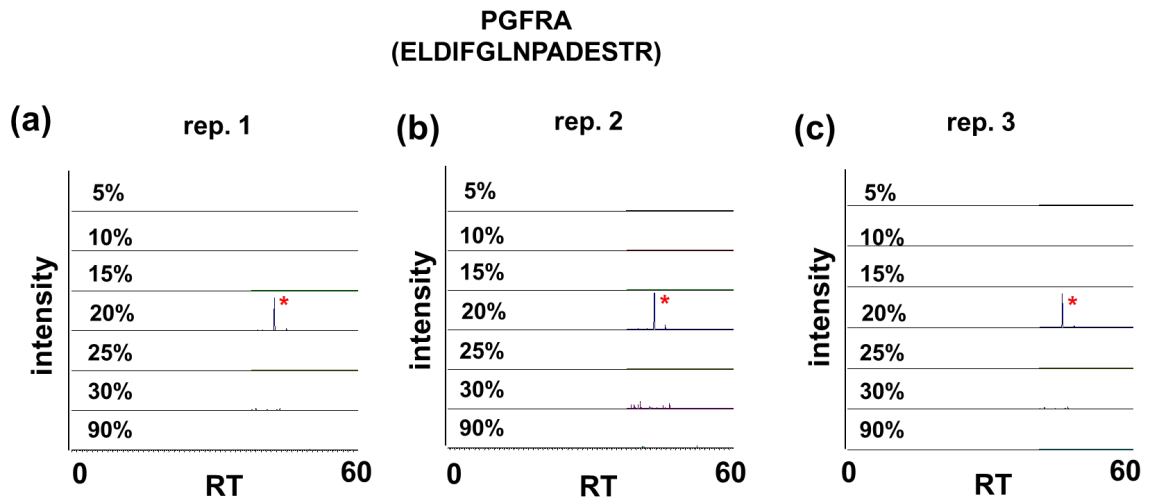

**Figure S8.** Efficient and reproducible fractionation of PTK peptides in 20  $\mu\text{g}$  11-18 cell by micro-brPLC. Digests (20  $\mu\text{g}$ ) from three replicate cultures of 11-18 cells were fractionated by micro-brPLC (7 fractions). One fourth of each fraction was analyzed on the Orbitrap Elite instrument with SIM acquisition targeted to the peptides IPLLENLQIIR (from EGFR) (precursor  $m/z$  604.8717, charge 2+) and ELDIFGLNPADESTR (from PDGFRA) (precursor  $m/z$  838.9099, charge Y+). Elution of the peptide in micro-brPLC fractions is monitored by the  $y_7$  fragment ion for IPLLENLQIIR ( $m/z$  885.5152) (A) and by the  $y_7$  fragment ion ( $m/z$  775.3581) of ELDIFGLNPADESTR (B). Asterisks mark peaks for target peptides.
